# Supplementary material for: Information and Communications Technology as a Health Promotion Method for Older Adults in Assisted-Living Facilities: Three-Arm Group-Randomized Trial
Source: PubMed Central journal article supplement (PMC6716436; doi:10.2196/12633), 2019-05-06
Supplement: aging_v2i1e12633_app1.pdf [file aging_v2i1e12633_app1.pdf]

**Multimedia Appendix 1.** Test of mean changes in quality of life, social support, happiness, and depressive symptoms after a 12-week intervention across the three groups

| Outcome                              | Within-group change, mean±SD       |                 |         |                                   |                 |              |                     |                 |        | Test for Between-group change <sup>a</sup> |                    |
|--------------------------------------|------------------------------------|-----------------|---------|-----------------------------------|-----------------|--------------|---------------------|-----------------|--------|--------------------------------------------|--------------------|
|                                      | ICT- communication group (A, n=19) |                 |         | ICT-entertainment group (B, n=18) |                 |              | Usual Care(C, n=17) |                 |        | <i>P-value</i>                             | Post Hoc           |
|                                      | Pre                                | Post            | Change  | Pre                               | Post            | Change       | Pre                 | Post            | Change |                                            |                    |
| HRQOL -Physical Component            | 27.70<br>±18.51                    | 27.24<br>±16.61 | -0.46   | 25.83<br>±17.06                   | 46.32<br>±11.86 | 20.49**<br>* | 25.88<br>±23.00     | 24.63<br>±23.54 | -1.25  | .002                                       | B>A **, A>C, B>C   |
| HRQOL -Mental Component              | 33.88<br>±18.14                    | 37.99<br>±16.28 | 4.11*   | 31.60<br>±16.46                   | 68.92<br>±15.81 | 37.32**<br>* | 36.03<br>±27.31     | 33.33<br>±25.04 | -2.71  | .000                                       | B>A **, A>C, B>C** |
| Social Support - Family/Friend       | 1.29<br>±0.21                      | 1.34<br>±0.19   | 1.48**  | 1.34<br>±0.29                     | 1.38<br>±0.30   | 0.04***      | 1.51<br>±0.31       | 1.51<br>±0.31   | 0      | .259                                       | A>B, A>C, C>B      |
| Social Support- Healthcare Workers   | 1.50<br>±0.24                      | 1.52<br>±0.20   | 0.02    | 1.68<br>±0.17                     | 1.78<br>±0.27   | 0.1**        | 1.64<br>±0.19       | 1.61<br>±0.18   | -0.03  | .002                                       | B>A *, A>C, B>C    |
| Social Support- Overall satisfaction | 2.16<br>±0.31                      | 2.36<br>±0.24   | 0.2***  | 2.34<br>±0.28                     | 2.55<br>±0.21   | 0.21***      | 2.32<br>±0.21       | 2.34<br>±0.16   | 0.02   | .008                                       | B>A, A>C, B>C      |
| Happiness                            | 3.21<br>±3.18                      | 4.00<br>±4.06   | 0.79*   | 4.17<br>±4.36                     | 7.89<br>±3.53   | 3.72**       | 3.47<br>±3.89       | 3.71<br>±3.95   | 0.24   | .033                                       | B>A, A>C, B>C      |
| Depressive Symptom Scale             | 13.74<br>±4.63                     | 11.00<br>±3.27  | -2.74** | 13.11<br>±4.63                    | 5.78<br>±3.27   | -<br>7.33*** | 11.06<br>±4.08      | 11.76<br>±4.64  | 0.7    | .000                                       | A>B **, C>A, C>B** |

a: P-value within-group change: \*<.05 \*\*<.01 \*\*\*<.001

b: P-value across three groups were compared using the Kruskal-Wallis Test and Dunn's nonparametric comparison for post hoc KW testing: \*<.005 \*\*<.001 were discerned significant after the Bonferroni adjustment.
